# Supplementary material
Source: HighWire-hosted journal article supplement (https://www.cmajopen.ca/highwire/filestream/80866/field_highwire_adjunct_files/0/open-2014-0101-01-at.pdf)
Supplement: open-2014-0101-01-at.pdf [file open-2014-0101-01-at.pdf]

## **Appendix 1 (as submitted by the authors): ICD-10 codes**

The following ICD-10 codes from BC Vital Statistics were utilized in this definition: accidental poisoning: E850-E854, E858, E862, E868; X40-X42, X46, X47; poisoning with undetermined intent: Y10-Y12, Y16, Y17; self-inflicted poisoning: E950-E952, X60-X69; self-inflicted injury by hanging, strangulation and suffocation: E953, X70; self-inflicted injury by drowning: E954, X71; self-inflicted injury by firearms and explosives: E955, X72-X75; self-inflicted injury by smoke, fire, flames, steam, hot vapors and hot objects: E958.1, E958.2; X76, X77; self-inflicted injury by cutting and piecing instruments: E956; codes X78, X79; self-inflicted injury by jumping from high places: E957, code X80; self-inflicted injury by jumping or lying before a moving object: code E958.0, code X81; self-inflicted injury by crashing of motor vehicle: code E958.5, X82; self-inflicted injury by other and unspecified means: E958.3, E958.4, E958.6-E958.9; X83, X84.
